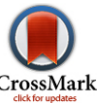

## Correction

# Correction: Severity-Based Adaptation with Limited Data for ASR to Aid Dysarthric Speakers

The *PLOS ONE* Staff

In the Introduction under the subheading “B. Adaptation of Dysarthric speech”, Equation 1 is incorrect. The correct version of Equation 1 is:

$$a_{ij} = p\{q_{t+1} = j | q_t = i\}, 1 \leq i, j \leq N \quad (1)$$

## Reference

1. Mustafa MB, Salim SS, Mohamed N, Al-Qatab B, Siong CE (2014) Severity-Based Adaptation with Limited Data for ASR to Aid Dysarthric Speakers. *PLoS ONE* 9(1): e86285. doi:10.1371/journal.pone.0086285

**Citation:** The *PLOS ONE* Staff (2014) Correction: Severity-Based Adaptation with Limited Data for ASR to Aid Dysarthric Speakers. *PLoS ONE* 9(5): e97665. doi:10.1371/journal.pone.0097665

**Published:** May 8, 2014

**Copyright:** © 2014 The *PLOS ONE* Staff. This is an open-access article distributed under the terms of the Creative Commons Attribution License, which permits unrestricted use, distribution, and reproduction in any medium, provided the original author and source are credited.
